# Supplementary material
Source: publisher figshare collection journal article supplement (https://acs.figshare.com/ndownloader/files/6924803)
Supplement: Supplementary file 1 [file 6924803]

## Supporting information

# Development of Ga salt of molybdophosphoric acid for biomass conversion to levulinic acid

Vijay Bhooshan Kumar, Indra Neel Pulidindi, Rahul Kumar Mishra, and Aharon

Gedanken\*

Department of Chemistry and Bar-Ilan Institute for Nanotechnology & Advanced Materials,

Bar Ilan University, Ramat-Gan 52900, Israel

\*Corresponding author email: [gedanken@mail.biu.ac.il](mailto:gedanken@mail.biu.ac.il)

Fax: 972-3-7384053; Tel: 972-3-5318315

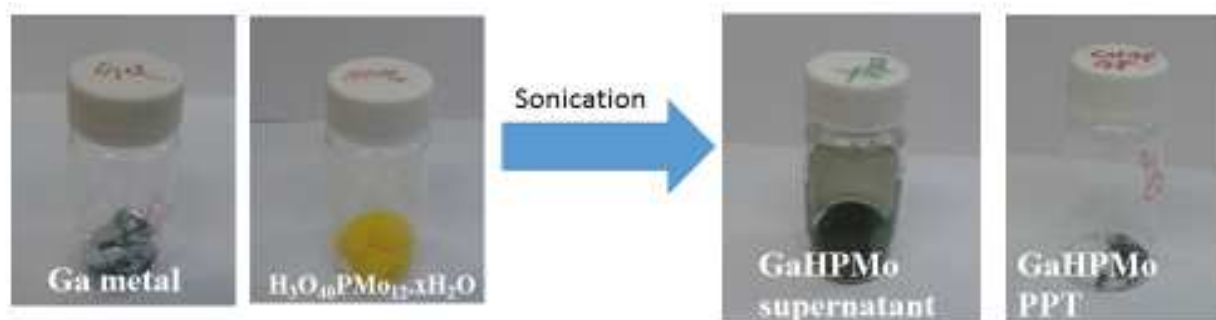

**Figure S1.** Pictorial representation of Ga metal, HPMo, GaHPMo (supernatant) and Ga@HPMo (precipitate)

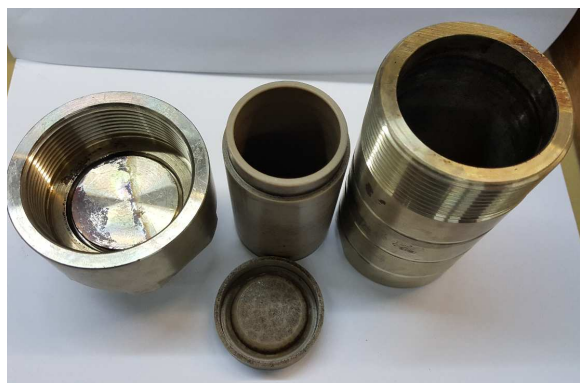

**Figure S2.** Various components of the autoclave (the metal rod on the right is used for opening and closing the reactor).

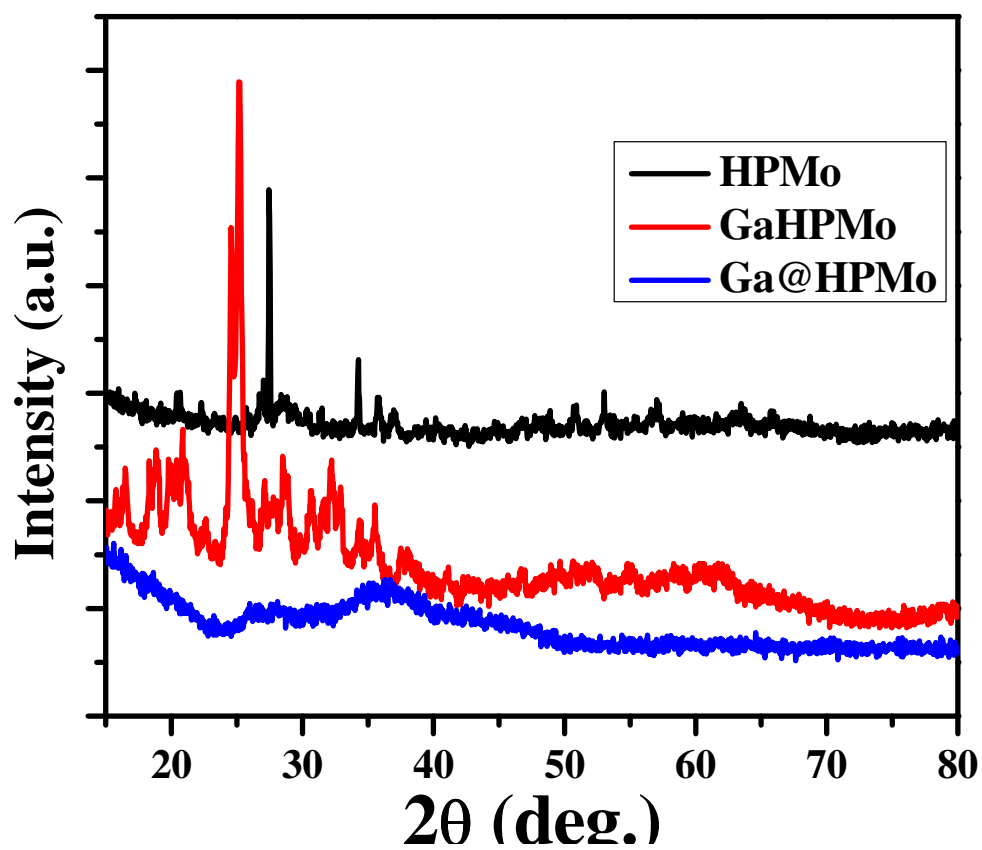

**Figure S3.** XRD patterns of HPMo, GaHPMo and Ga@HPMo

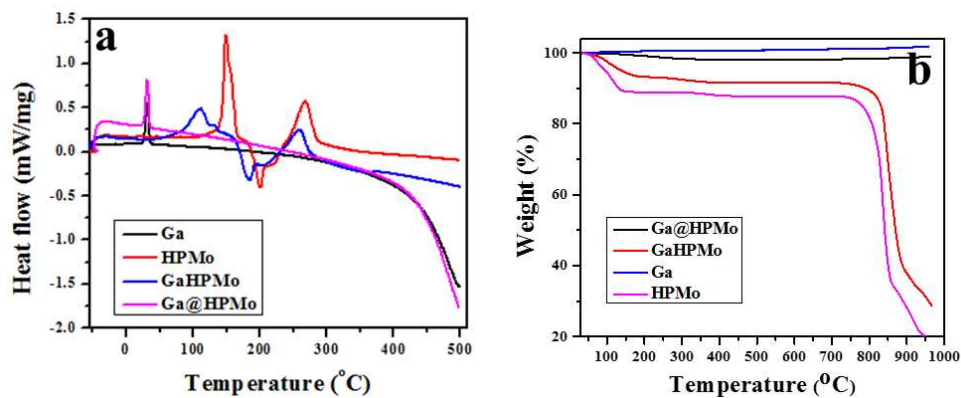

**Figure S4.** (a) DSC (b) TGA traces of Ga metal, HPMo, GaHPMo, and Ga@HPMo.

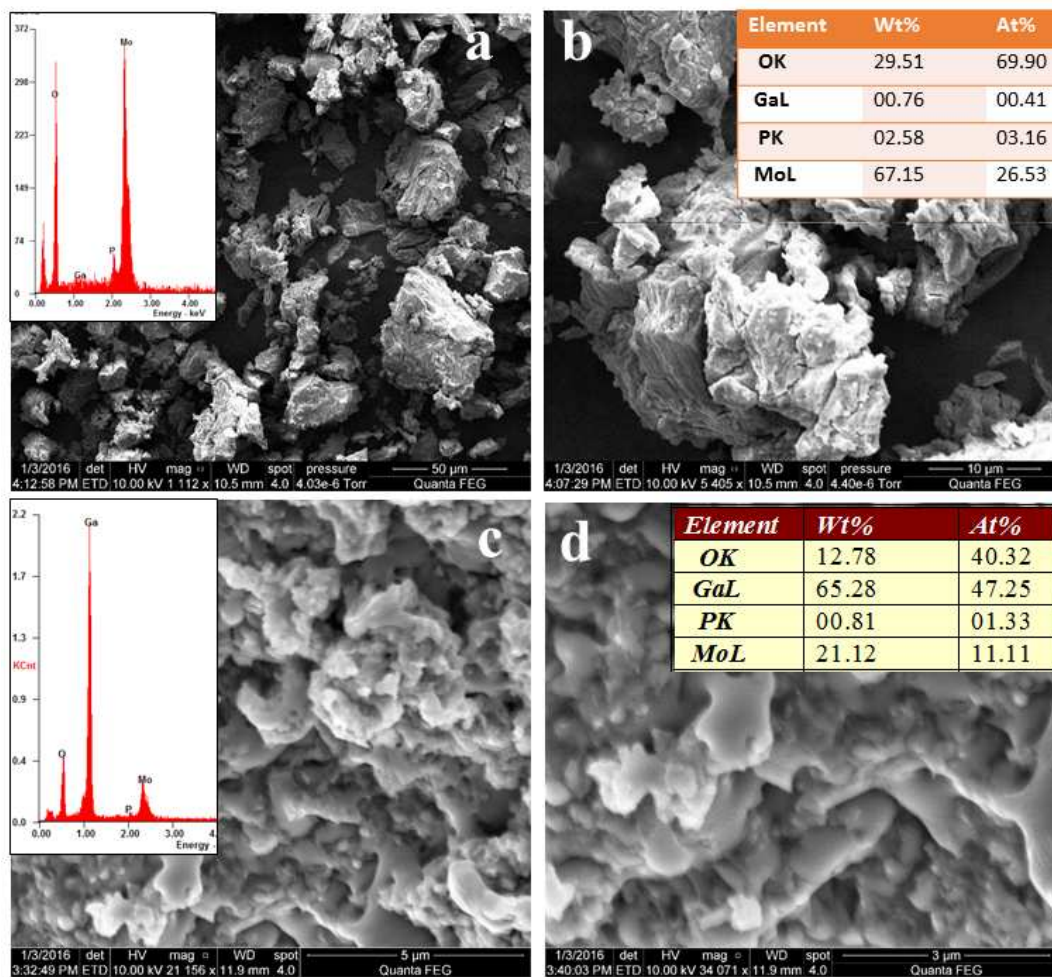

**Figure S5.** SEM images of (a, b) GaHPMo (inset: EDS), (c, d) Ga@HPMo (inset: EDS).

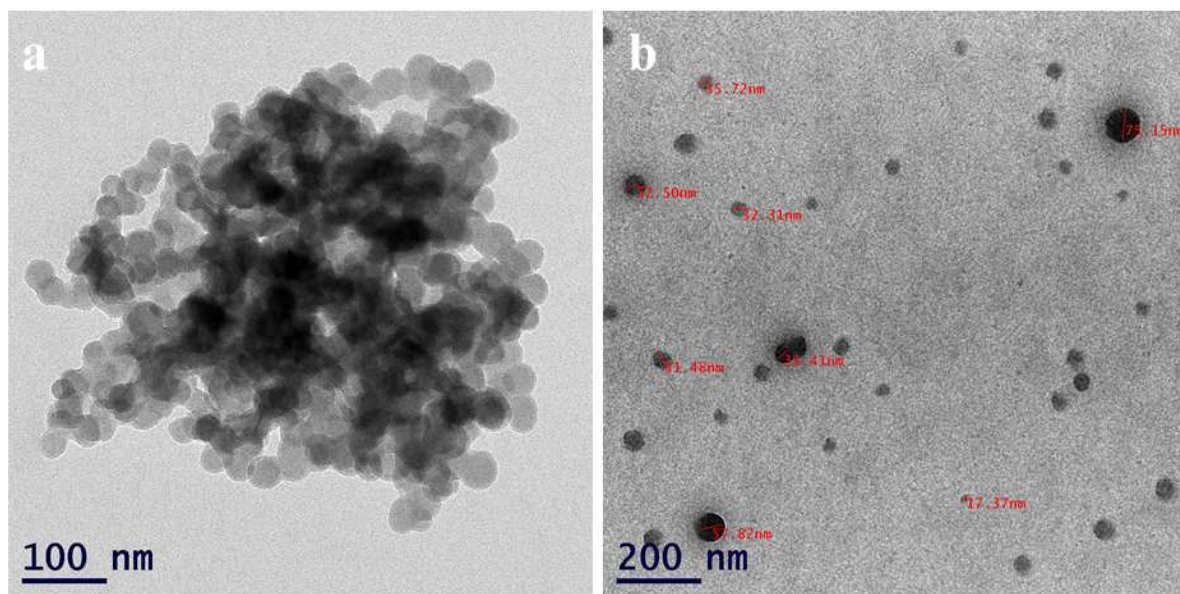

**Figure. S6.** TEM images of (a) Ga@HPMo (b) GaHPMo.

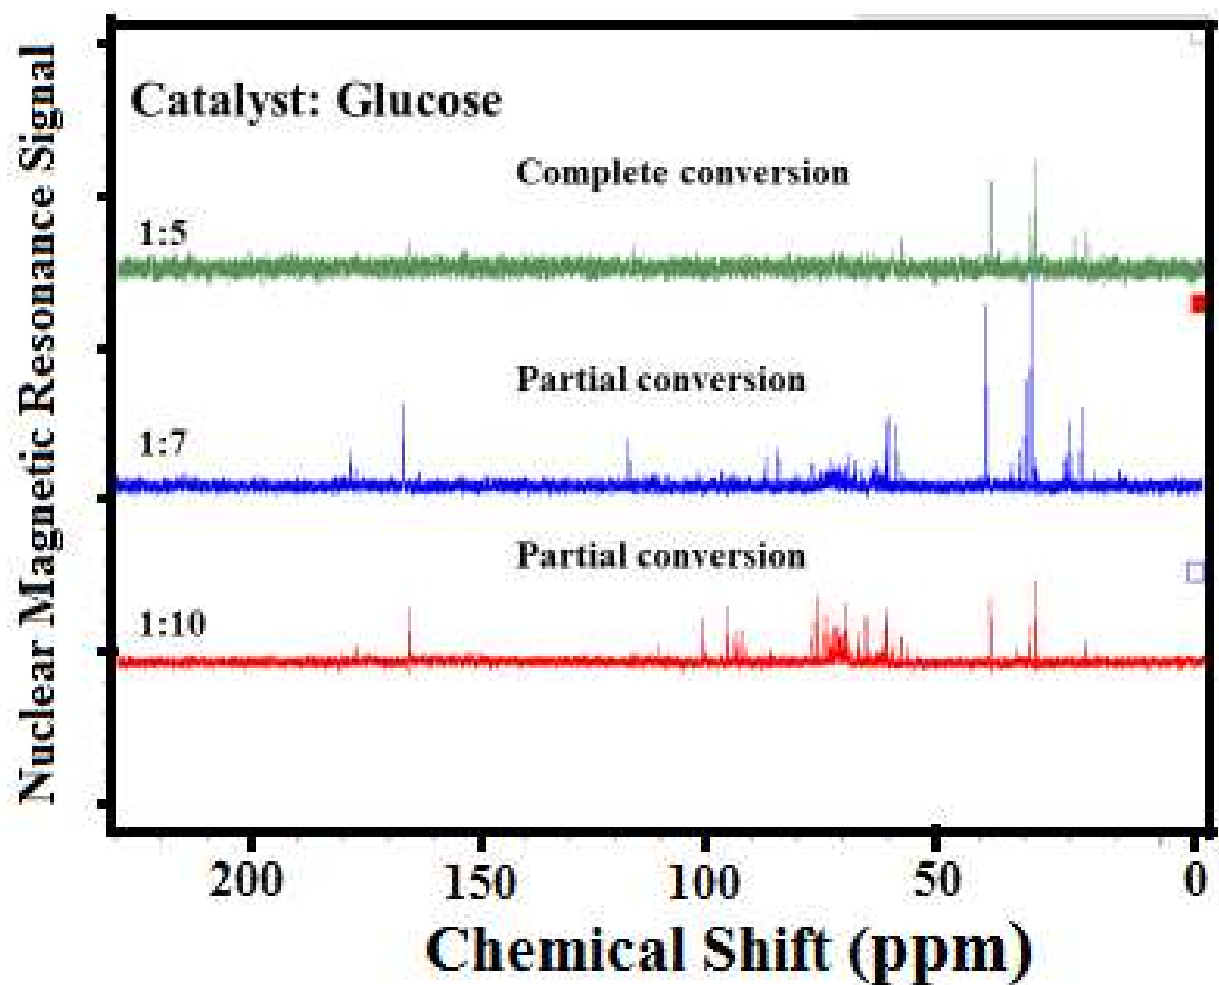

**Fig. S7**  $^{13}\text{C}$  NMR spectra of the reaction product obtained from the hydrothermal reaction (6 h at 150 °C) with different ratios of the catalyst (GaHPMo) and glucose.

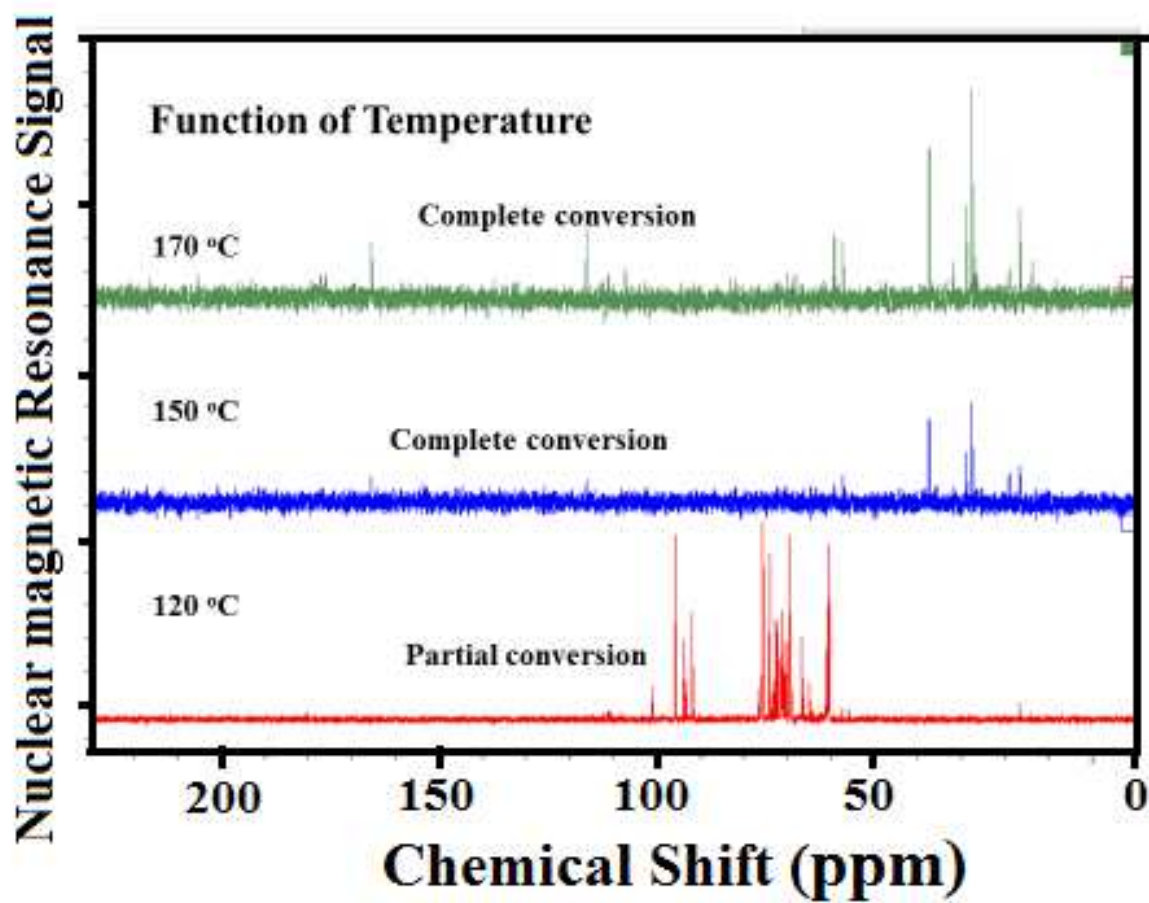

**Fig. S8.**  $^{13}\text{C}$  NMR spectrum of the product obtained at deferent reaction temperatures.
